# Supplementary material for: Using Tomato Recombinant Lines to Improve Plant Tolerance to Stress Combination Through a More Efficient Nitrogen Metabolism
Source: PubMed Central journal article supplement (PMC6983915; doi:10.3389/fpls.2019.01702), 2020-01-17

**Supplemental Scheme 1. Experimental design for the three experiments carried out for the selection and experimentation with the tomato RILs population**

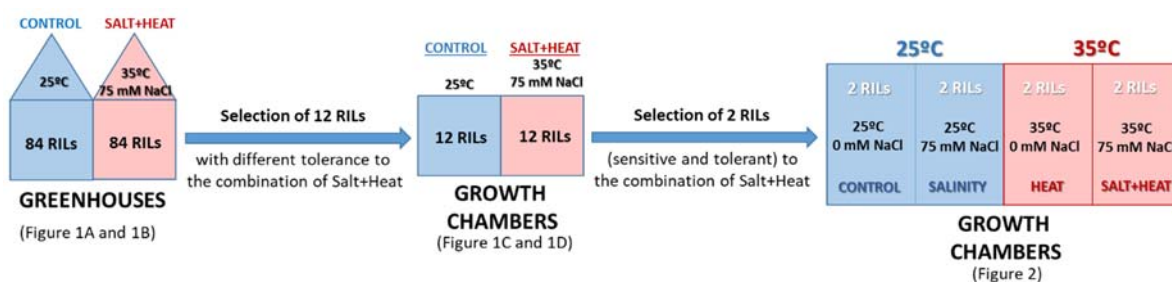

**Supplemental Table S1.** Absolute values obtained in cations concentration ( $\mu\text{mol/g DW}$ ) in leaves of two tomato recombinant lines (RIL-66 and RIL-76) under control, simple stress (salinity or heat) or the combination of salinity+heat. Values are means ( $n=6$ )

| Treatment | Recomb. Line | Na <sup>+</sup> | K <sup>+</sup> | Ca <sup>2+</sup> | Mg <sup>2+</sup> |
|-----------|--------------|-----------------|----------------|------------------|------------------|
| Control   | RIL-66       | 2.47234158      | 244.607857     | 113.450981       | 28.9775737       |
|           | RIL-76       | 2.98536357      | 308.253496     | 127.330764       | 28.4618876       |
| Salinity  | RIL-66       | 110.821929      | 104.709183     | 110.388532       | 11.3756017       |
|           | RIL-76       | 146.06509       | 158.638543     | 124.314263       | 26.8133111       |
| Heat      | RIL-66       | 3.22416865      | 319.116882     | 115.430588       | 28.9804243       |
|           | RIL-76       | 3.10699108      | 295.30514      | 117.081159       | 29.4970716       |
| Sal+Heat  | RIL-66       | 82.6482231      | 106.63768      | 90.7005475       | 12.7424652       |
|           | RIL-76       | 101.407195      | 291.575017     | 86.5951295       | 26.6791909       |

**Supplementary Table S2.** Absolute values obtained in amino acids concentration ( $\mu\text{mol/g DW}$ ) in leaves of two tomato recombinant lines (RIL-66 and RIL-76) under control, simple stress (salinity or heat) or the combination of salinity+heat. Values are means ( $n=6$ )

| Treatment | Recomb. Line | $\mu\text{mol/g DW}$ |      |      |      |      |      |      |        |      |       |       |      |       |
|-----------|--------------|----------------------|------|------|------|------|------|------|--------|------|-------|-------|------|-------|
|           |              | GABA                 | Ala  | Val  | Pro  | Asn  | Trp  | Tyr  | Isoleu | Thr  | Arg   | Glu   | Phe  | Gln   |
| CONTROL   | RIL-66       | 0.39                 | 1.26 | 0.08 | 0.49 | 1.99 | 0.03 | 0.03 | 0.11   | 0.38 | 8.69  | 27.49 | 0.08 | 7.12  |
|           | RIL-76       | 0.41                 | 1.14 | 0.07 | 0.56 | 1.69 | 0.03 | 0.03 | 0.08   | 0.43 | 8.38  | 27.33 | 0.07 | 7.97  |
| SALINITY  | RIL-66       | 0.09                 | 0.62 | 0.05 | 3.30 | 1.05 | 0.02 | 0.03 | 0.09   | 0.19 | 7.11  | 18.15 | 0.03 | 3.58  |
|           | RIL-76       | 0.23                 | 0.51 | 0.05 | 2.79 | 1.03 | 0.01 | 0.13 | 0.08   | 0.18 | 5.76  | 40.62 | 0.02 | 3.14  |
| HEAT      | RIL-66       | 0.22                 | 0.74 | 0.10 | 1.02 | 3.28 | 0.02 | 0.05 | 0.14   | 0.28 | 8.31  | 17.27 | 0.06 | 10.10 |
|           | RIL-76       | 0.43                 | 0.99 | 0.09 | 2.36 | 2.79 | 0.02 | 0.04 | 0.09   | 0.34 | 8.18  | 28.77 | 0.05 | 6.38  |
| SAL+HEAT  | RIL-66       | 0.25                 | 0.74 | 0.08 | 2.67 | 1.27 | 0.02 | 0.04 | 0.13   | 0.24 | 13.91 | 23.24 | 0.04 | 4.95  |
|           | RIL-76       | 1.54                 | 0.91 | 0.14 | 3.48 | 4.61 | 0.02 | 0.05 | 0.14   | 0.24 | 3.45  | 33.45 | 0.04 | 14.93 |

**Supplementary Table S3.** Primers sequences of the N-metabolism related transcripts tested by qPCR in leaves of two tomato recombinant lines (RIL-66 and RIL-76). *SIEF1* was used as internal control for data normalization.

| Gene            |                                                 | Accession          | Sense primer sequence      | Antisense primer sequence     |
|-----------------|-------------------------------------------------|--------------------|----------------------------|-------------------------------|
| <i>SINR</i>     | Nitrate reductase                               | Solye11g013810.1.1 | GGTTCATCACTCCCGTACCACTT    | TCTGCTTCACCATATTCGTCTCT       |
| <i>SINiR</i>    | Nitrite reductase                               | Solye01g108630.2.1 | GGATTCATGGGATGCCTGACTAGA   | TTCTCGTGGAACTGCACCAAAGT       |
| <i>SIGLT1</i>   | Glutamate synthase, NADH/NADPH, small subunit 1 | Solye03g083440.2.1 | GGGAGAGTTTGGGGTAGGGAATA    | CAAGCAAACCTGGCAGCAGACATA      |
| <i>SIGS</i>     | Chloroplast Glutamine synthetase                | Solye01g080280.2.1 | AGCTTGACCTTGTGAGTTCCCT     | CACCTCAACTCCAAAGTAGTCTCATCTCT |
| <i>SIGTS1</i>   | Cytosolic Glutamine synthetase                  | Solye10g083830.1.1 | ACACGGAGAAGGAAGGAAAGGGAT   | TCCGCGATCATAGAGGTCACAACA      |
| <i>SIGDH1</i>   | Glutamate dehydrogenase                         | Solye10g078550.1.1 | GTTTACTGGCTTGGACCTCAGTTT   | CACCTTGTCCATGGCAGAACTTACA     |
| <i>SIASNI</i>   | Asparagine synthase                             | Solye04g055200.2.1 | AACCTTGATCCTTCTGGTAGGGCT   | TCGAGTCATGGACAGCAAGAGACT      |
| <i>SINRT2.1</i> | Nitrate transporter protein 2.1                 | Solye11g069740.1.1 | TCCAGTCAAGGGAACGGAAGAACA   | ACCACGCTCTGATCGGCAATTT        |
| <i>SIAMTL1</i>  | Ammonium transporter protein 1                  | Solye09g090730.1.1 | ATGTGGGTTCTGTAGCGGCTTGTAGT | TGCTGCTTCAAGTGGATCGTCGTA      |
| <i>SIAMT2</i>   | Ammonium transporter protein 2                  | Solye04g050440.2.1 | TTGTACCGCCGCTCTGACAACTTT   | CATGGCTCAACAACTGCACAACCT      |
| <i>SIEF1 α</i>  | Elongation factor 1α                            | Solye06g005060.2.1 | GAACGTGCCAGTTGGTCTGT       | GTCAAACCAGTAGGGCCAAA          |

**Supplementary Table S4.** Log<sub>2</sub> of the expression of a selected set of transcripts related to the N-metabolism. Transcript expression was determined by qPCR (Applied Biosystems, Lincoln, NE) using the primers pair listed in Supplemental Table S3. Normalization of the expression was done using the internal and constitutive control *SIERF1* and samples normalization for log<sub>2</sub> calculation was performed with respect to control plants before stress (n=6).

|                  | SALINITY    |             | HEAT        |             | SALINITY+HEAT |             |
|------------------|-------------|-------------|-------------|-------------|---------------|-------------|
|                  | RIL-66      | RIL-76      | RIL-66      | RIL-76      | RIL-66        | RIL-76      |
| <i>SINR</i>      | -2.02624257 | -1.48715496 | 0.1003437   | 0.74896037  | -1.0749925    | 2.04905732  |
| <i>SINiR</i>     | -1.01979764 | 1.34570217  | 0.42772611  | 2.1402998   | -0.44874573   | 1.61988386  |
| <i>SIGLT1</i>    | -0.21411133 | -0.43099817 | 0.31886355  | -0.23856195 | -0.93396346   | 0.89916852  |
| <i>SIGS</i>      | -0.67519976 | -0.39715735 | -0.31491915 | -0.802543   | 0.49639257    | -0.57151222 |
| <i>SIGTS</i>     | -0.97664611 | -0.76421642 | -0.19662507 | -0.01933543 | 0.46724923    | -1.12042618 |
| <i>SIGDH</i>     | -0.2961262  | -0.04336866 | -0.16730321 | 0.1210289   | 1.04047061    | 0.62991034  |
| <i>SIASNI</i>    | -0.3254877  | -0.47721831 | -0.0112547  | 1.25095113  | 0.38          | -0.18233999 |
| <i>SINRT 1.2</i> | -0.9604084  | 0.26059062  | 3.53222046  | 0.18383471  | -1.34827728   | 1.27987989  |
| <i>SIATM1</i>    | 0.24454447  | 0.64554297  | 5.78692576  | 1.9982645   | 0.06776047    | 2.99190254  |
| <i>SIATM2</i>    | -0.89261818 | -0.00200144 | 6.37705326  | 2.14450264  | 0.81360817    | 2.33149052  |

**Supplementary Figure S1. Principal Component Analysis (PCA) in RIL-66.** A PCA analysis was done with the 45 variables studied in this manuscript, with the components PC1, PC2 and PC3 explaining 100% of the variability (PC1 and PC2 explained 80.10% of the variability). **PC1** (51.81%) explained FW, Pnet, gs, Na, K, Mg, Total-N, N-org, Total Soluble Proteins, Total Amino Acids Conc, Val, Asn, Trp, Glu, Phe, Gln, SINR, *SINiR*, *SINTR1.2* and NiR activity. PC1 lets differentiate between the treatments without heat (salinity and control) against those treatments with heat as a factor (heat and salinity+heat). **PC2** (28.29%) explained Pnet, gs, Na, K, Mg, Total-N, N-org, Total Soluble Proteins, Total Amino Acids Conc, Val, Asn, Trp, Glu, Phe, Gln, *SINR*, *SINiR*, *SINTR1.2* and NiR activity. PC2 lets differentiate between the treatments salinity+heat and control against heat and salinity. And **PC3** (19.90%) explained DW, ETR, N-NO<sub>3</sub>, GABA, Ala, Thr, Arg, SIGS, *SIAMT1*, *SIAMT2*, GOGAT activity, GS activity, GDH activity. PC3 lets differentiate between the treatments with salinity (salinity and salinity+heat) against those treatments without salinity as a factor (heat and control).

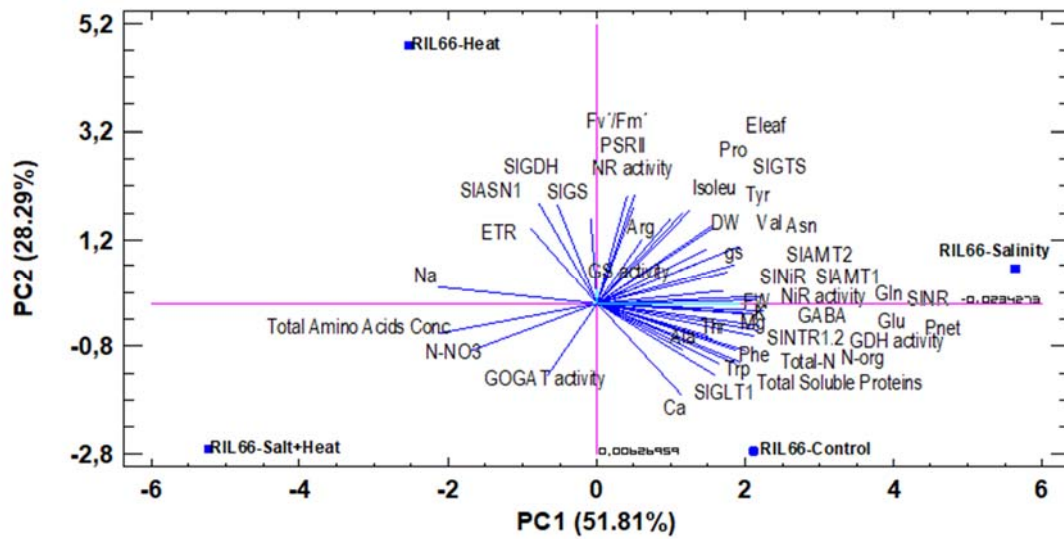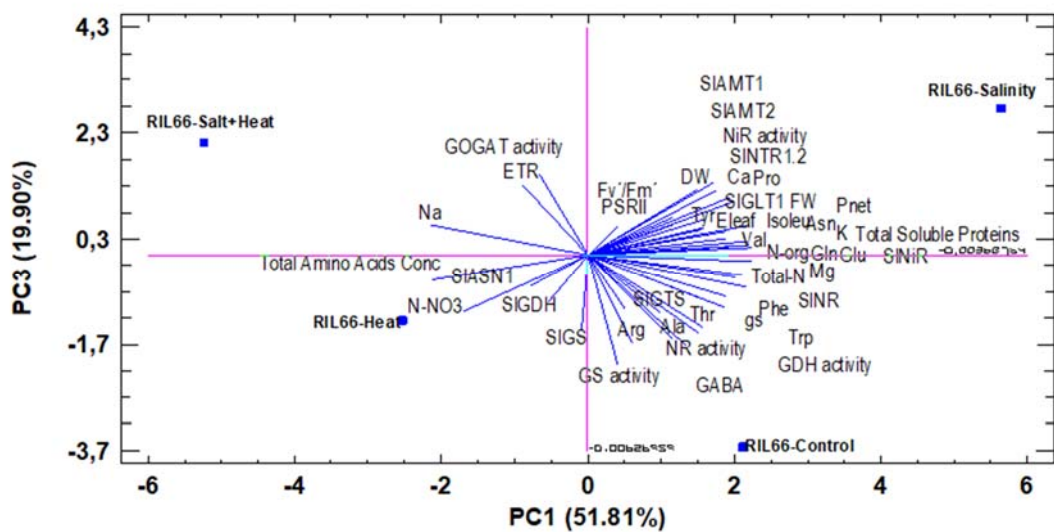

**Supplementary Figure S2. Principal Component Analysis (PCA) in RIL-76.** A PCA analysis was done with the 45 variables studied in this manuscript, with the components PC1, PC2 and PC3 explaining 100% of the variability (PC1 and PC2 explained 78.93% of the variability). **PC1** (49.30%) Val, Pro, Asn, Isoleu, gs, Eleaf, Ca, N-NO3, Arg, Glu, Gln, SINR, SIAMT1, SIAMT2, SINTR1.2, NR activity, GOGAT activity, GS activity, GDH activity, PSRII, ETR and GABA. This factor lets differentiate between the four treatments applied independently. **PC2** (29.63%) explained Tyr, Thr, Phe, Fv'/Fm', SIGTS, SIASN1, NiR activity, K, Mg, Na, Total-N, N-org, Total Soluble Proteins, Total Amino Acids Conc. PC2 lets differentiate between the treatments with heat (salinity+heat and heat) against those without heat as a factor (control and salinity). And **PC3** (21.07%) explained Ala, Trp, Gln, SINiR, SIGS, DW, Pnet, Fv'/Fm'. PC3 lets differentiate between the treatments with salinity (salinity and salinity+heat) against those treatments without salinity as a factor (heat and control).

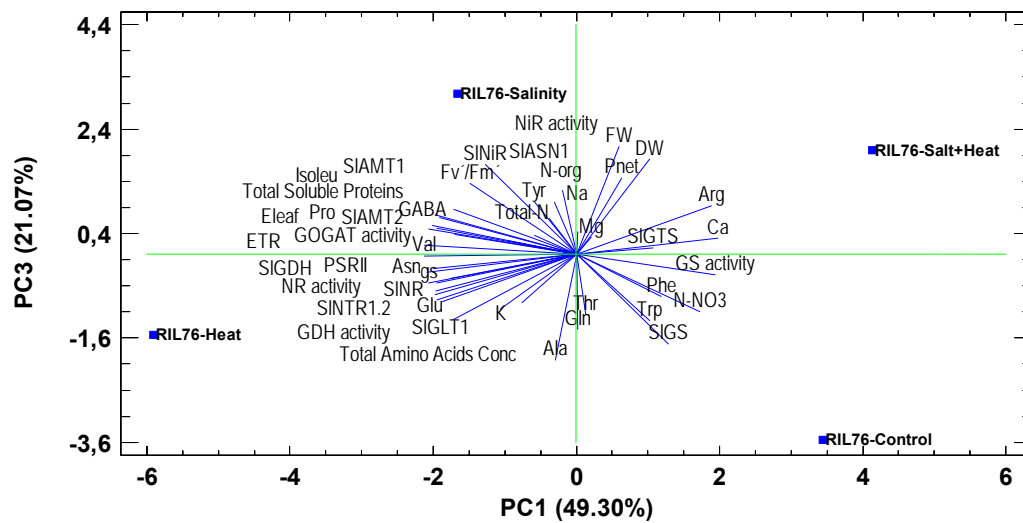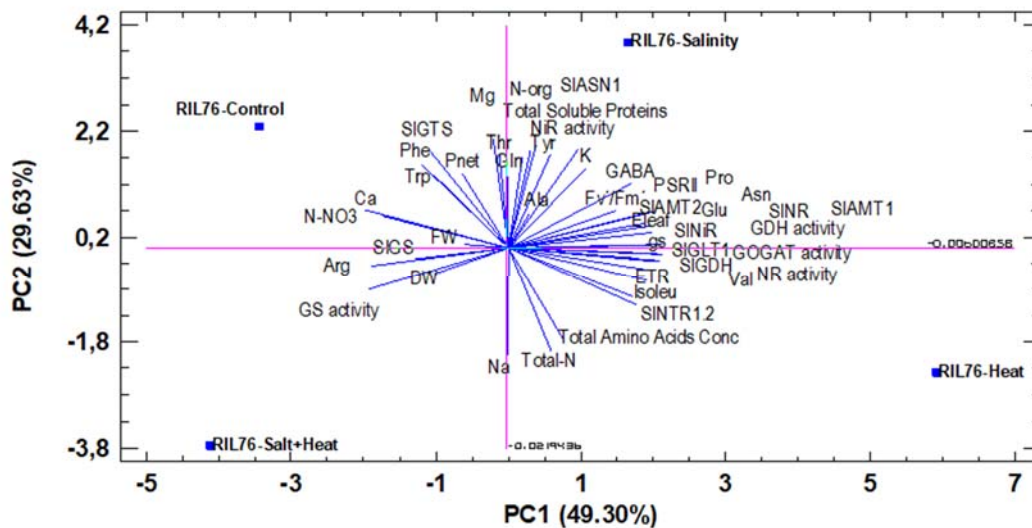

**Supplementary Figure S3. A.** Dendrogram with Ward's method for treatments separation in RIL-66. **B.** Dendrogram with Ward's method for treatments separation in RIL-/6.

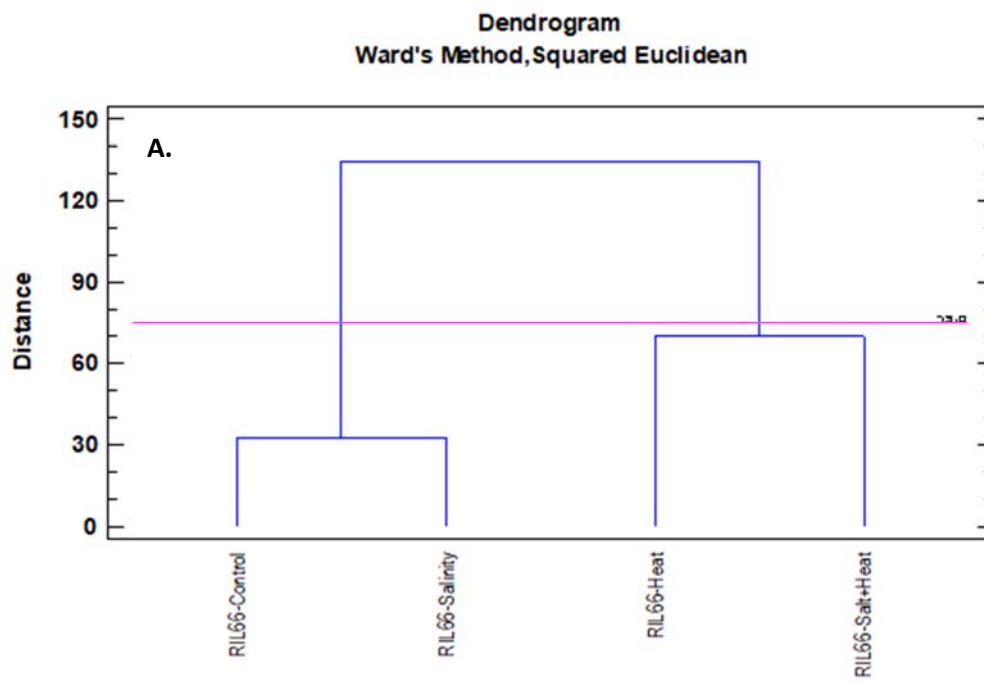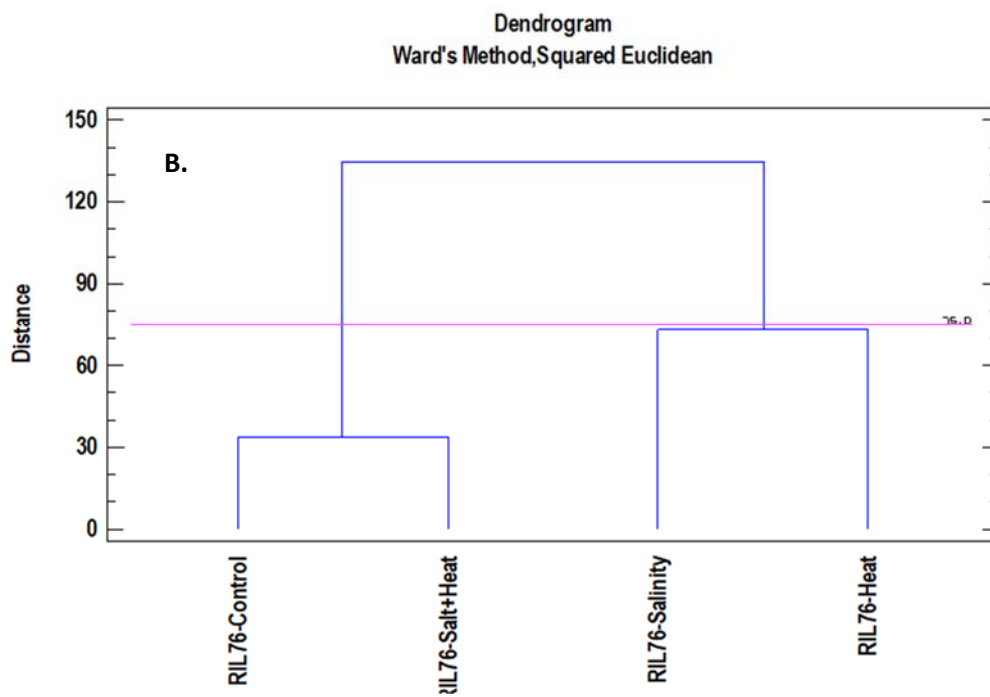

Supplement: DataSheet_1.pdf [file DataSheet_1.pdf]
